## 1 Chromatin accessibility profiling in tissue sections by spatial ATAC

2  
3 Enric Llorens-Bobadilla<sup>1\*#</sup>, Margherita Zamboni<sup>1,2\*</sup>, Maja Marklund<sup>2\*</sup>, Nayanika Bhalla<sup>2</sup>,  
4 Xinsong Chen<sup>3</sup>, Johan Hartman<sup>3,4</sup>, Jonas Frisén<sup>1</sup>, Patrik L Ståhl<sup>2#</sup>.

5  
6 <sup>1</sup>Department of Cell and Molecular Biology, Karolinska Institute, Stockholm, Sweden

7 <sup>2</sup>SciLifeLab, Department of Gene Technology, KTH Royal Institute of Technology,  
8 Stockholm, Sweden

9 <sup>3</sup>Department of Oncology-Pathology, Karolinska Institute, Stockholm, Sweden

10 <sup>4</sup>Department of Clinical Pathology and Cancer Diagnostics, Karolinska University Hospital,  
11 Stockholm, Sweden

12  
13 \*These authors contributed equally

14 #email: [enric.llorens@ki.se](mailto:enric.llorens@ki.se); [patrik.stahl@scilifelab.se](mailto:patrik.stahl@scilifelab.se)

### 15 16 Abstract

17  
18 Current methods for epigenomic profiling are limited in the ability to obtain genome wide  
19 information with spatial resolution. Here we introduce spatial ATAC, a method that integrates  
20 transposase-accessible chromatin profiling in tissue sections with barcoded solid-phase capture  
21 to perform spatially resolved epigenomics. We show that spatial ATAC enables the discovery  
22 of the regulatory programs underlying spatial gene expression during mouse organogenesis,  
23 lineage differentiation and in human pathological samples.

### 24 25 Main text

26  
27 In multicellular organisms, cells progressively acquire specialized gene expression programs  
28 according to their position within a tissue<sup>1</sup>. Cell type specific gene expression patterns result in  
29 part from the interaction between the transcriptional machinery and regulatory elements in the  
30 chromatin<sup>2,3</sup>, a process dysregulated in disease<sup>4,5</sup>. Multiple methods have been developed to  
31 integrate gene expression and chromatin accessibility measurements in single cells<sup>6-8</sup>. Single  
32 cell methods typically require tissue dissociation, and a wealth of spatial profiling methods  
33 have recently been developed to overcome this limitation, particularly on the transcriptome  
34 level<sup>9</sup>. However, we remain limited in our ability to interrogate chromatin accessibility with  
35 spatial resolution<sup>10,11</sup>.

36  
37 We developed spatial ATAC to perform spatially resolved chromatin accessibility profiling in  
38 tissue sections. Spatial ATAC combines the assay for transposase-accessible chromatin and  
39 sequencing (ATAC-seq<sup>12</sup>) with tagmented DNA capture on a solid surface containing barcoded  
40 oligonucleotides, using an experimental platform analogous to our previous spatial  
41 transcriptomics approach<sup>13</sup>. First, we immobilize fresh frozen tissue sections onto barcoded  
42 slides and crosslink them to preserve chromatin structure during immunostaining.  
43 Immunostained sections are then imaged to register tissue coordinates and protein expression  
44 data. In the next step Tn5 transposition is performed directly in permeabilized sections to  
45 tagment open chromatin. With the help of a chimeric splint oligonucleotide, DNA tagments  
46 are hybridized to spatially barcoded surface oligonucleotides during gentle tissue digestion.  
47 Ligation to the splint and subsequent polymerase gap fill and extension generate open  
48 chromatin fragments carrying a spatial barcode and PCR handles that are used for generating  
49 a sequencing library (Fig. 1a).

50 We performed spatial ATAC on replicate tissue sections from three stages of mouse gestational  
51 development (embryonic days E12.5, E13.5 and E15.5). Spatially barcoded open chromatin  
52 fragments showed high enrichment around transcriptional start sites (TSS) as well as  
53 nucleosome periodicity, hallmarks of ATAC-seq (Fig. 1b and Extended Data Fig. 1). We  
54 captured a median of 6100, 3100 and 7100 unique fragments per 55  $\mu\text{m}$  spot, with 14, 15 and  
55 18% overlapping TSS in E12.5, E13.5 and E15.5 sections respectively. These metrics are  
56 within the range of reference single-nucleus ATAC-seq data from E18 mouse brain (Extended  
57 Data Fig. 1a-d). Additionally, the aggregate distribution of fragments across the genome  
58 showed a very high concordance with reference bulk datasets from ENCODE<sup>14</sup> (Extended Data  
59 Fig. 1e). We next created a peak spatial barcode count matrix using a common reference peak  
60 set across sections that were analyzed by latent semantic indexing (LSI) and uniform manifold  
61 approximation and projection (UMAP) for dimensionality reduction<sup>15</sup>. Unsupervised  
62 clustering identified 11 main clusters, which when projected in their original spatial coordinates  
63 revealed a high concordance with anatomical landmarks and were consistent not only across  
64 replicate sections but also across developmental stages (Fig. 1c-d and Extended Data Fig. 2).  
65 This clustering agreed with spatial-aware non-negative matrix factorization (NMF)  
66 dimensionality reduction and clustering<sup>16</sup>, suggesting that spatial location is a major source of  
67 variation in chromatin accessibility across and within developing tissues (Extended Data Fig.  
68 3a-d). As expected, the dataset structure reflected variation in the accessibility of promoters  
69 and a larger set of distal peaks (Fig. 1e). Using differential accessibility analyses we found  
70 18,000 differentially accessible peaks that showed specific patterns of accessibility across  
71 developing tissues (Fig. 1f-g).

72 We next computed gene activities (i.e., accessibility at gene locus and promoter), which  
73 revealed 2000 differentially accessible genes between clusters that were enriched for gene  
74 ontology terms characteristic of the respective tissue region (Extended Data Fig. 4). For  
75 example, central nervous system (CNS) clusters showed increased accessibility in genes known  
76 to be involved in neurogenesis (e.g., *Sox1*, *Foxg1*, *Notch1*). Bone and muscle mesenchyme  
77 clusters showed increased accessibility in myofiber, collagen, and TGF- $\beta$  signaling genes (e.g.,  
78 *Myh9*, *Col1a1*, *Smad3*) while the fetal liver cluster was characterized by the accessibility of  
79 genes involved in hematopoiesis (e.g., *Hba-a1*, *Tal1*, *Sptb*).

80 Next, we sought to integrate spatial ATAC with Visium spatial transcriptomics. We performed  
81 Visium on tissue sections from the same developmental stages, which showed regionally  
82 consistent clustering (Extended Data Fig. 5) and genes found as differentially accessible using  
83 spatial ATAC showed higher expression in the corresponding Visium cluster (Fig. 2a).  
84 Unsupervised denoising and imputation methods have been developed to account for the  
85 intrinsic sparsity of single-cell transcriptomics and ATAC-seq data which improve  
86 visualization and feature-to-feature correlation<sup>17,18</sup>. We applied a denoising deep count  
87 autoencoder to our spatial ATAC and Visium datasets<sup>18</sup>, which increased signal to noise in  
88 feature visualization while preserving clustering structure (Extended Data Fig. 5). To identify  
89 putative regulatory elements underlying spatial patterns of gene expression, we performed peak  
90 co-accessibility analyses which identified 6000 peaks linked to cluster marker genes. With this  
91 strategy, we identified individual distal regulatory elements whose accessibility correlated to  
92 gene expression across tissues (Extended Data Fig. 6) and agreed with enhancer reporter assays  
93 (Extended Data Fig. 7). To gain further insight into regulatory programs underlying gene  
94 expression, we performed motif enrichment analysis on these cluster-specific distal peaks. We  
95 found that the most enriched motifs in CNS clusters corresponded to well characterized  
96 proneural transcription factors (e.g., *Neurog1*, *Neurod1*, *Ascl1*). Conversely, motifs enriched  
97 in mesenchymal regulatory elements corresponded to factors known to be involved in bone and  
98 muscle development (e.g., *Smad3*, *Twist1*, *Myog*), while liver-specific distal regulatory

99 elements were highly enriched in binding sites for Tall and Gata transcription factors,  
100 consistent with their role in hematopoiesis (Extended Data Fig. 6d).  
101 To evaluate whether spatial ATAC could identify regulatory programs underlying lineage  
102 differentiation within a developing tissue, we focused on the cerebral cortex at E15.5, a well  
103 characterized structure in which SOX2<sup>+</sup> progenitors in the subventricular zone generate  
104 neurons that migrate to upper cortical layers<sup>19</sup>. Based on SOX2 immunostaining, we selected  
105 progenitor- and neuron-rich spots and performed motif enrichment on the top differentially  
106 accessible peaks (Fig. 2d-f). We identified cortical progenitor (e.g., Sox2, Lhx2, Emx1) and  
107 neuronal (e.g., Neurog1, Cux2) transcription factors among the top enriched motifs in the  
108 respective clusters (Fig. 2f). Further, we could link regulatory elements to the nearest genes  
109 that showed the corresponding patterns of layer-specific gene expression (Fig. 2g). Next, we  
110 integrated the cortex spatial ATAC spots with single cell RNA-seq data from the same  
111 developmental stage<sup>20</sup>. Using the integrated dataset, we calculated pseudotime scores along the  
112 neuronal differentiation trajectory, which aligned single cells and spatial ATAC spots and  
113 recapitulated the inside-out differentiation trajectory of the developing cortex (Fig. 2h).  
114 Finally, we applied spatial ATAC to human breast cancer, a tumor type of widespread public  
115 health concern in which pathological classification informs therapy decisions<sup>21</sup>. We profiled  
116 adjacent sections using Visium and spatial ATAC. Spatial ATAC clustering and marker  
117 expression aligned with pathologist annotations, agreed with Visium clustering, and could  
118 readily identify HER2-positive regions, their associated non-coding region accessibility, and  
119 the presence of myeloid cells in the immediate tumor microenvironment (Fig. 2i-k, Extended  
120 Data Fig. 8-10).  
121 Our spatial ATAC platform is readily implementable through common laboratory workflows  
122 and offers the possibility for integration with other ‘omics modalities. We envision that spatial  
123 ATAC will enable spatial non-coding functional genomics, while being instrumental in the  
124 identification of regulatory elements for specific cell targeting in gene therapy and the study of  
125 gene regulatory networks in development and disease.

Figure 1

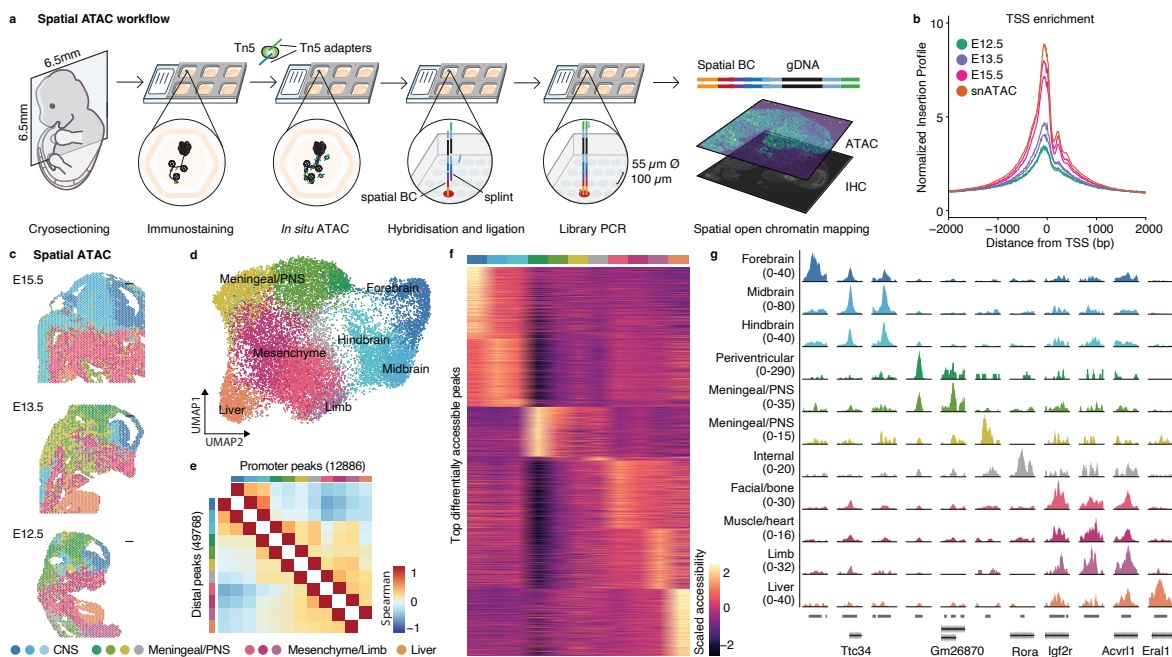

126 **Figure legends**

127

128 **Figure 1. Workflow and spatial mapping of chromatin accessibility in mouse embryos**

129 **a.** Schematic workflow of spatial ATAC. Transposition with Tn5 is performed on  
130 immunostained tissue cryosections immobilized on a barcoded slide. Transposed fragments are  
131 surface-captured using a splint oligonucleotide, which is ligated and extended to allow the  
132 generation of a spatially barcoded DNA library. **b.** Enrichment of ATAC-seq fragments around  
133 TSS in spatial ATAC performed on mouse embryos (E12.5, E13.5, E15.5) in comparison with  
134 single-nucleus ATAC-seq from 10X genomics (E18; snATAC). **c.** Clustering of spatial ATAC  
135 open chromatin fragments projected on their spatial location. **d.** UMAP of all spots from mouse  
136 embryo sections colored by cluster as in c. **e.** Cluster-wise correlation of the accessibility of  
137 the top 25% variable promoter (+1000, -100bp from TSS) and distal peaks. **f.** Heatmap showing  
138 scaled accessibility of the top differentially accessible peaks per cluster. **g.** Genome tracks  
139 showing normalized spatial ATAC-seq fragment density for peaks showing cluster-specific  
140 accessibility. Cluster colors are consistent from c-g. Scale bars are 500  $\mu\text{m}$ .

Figure 2

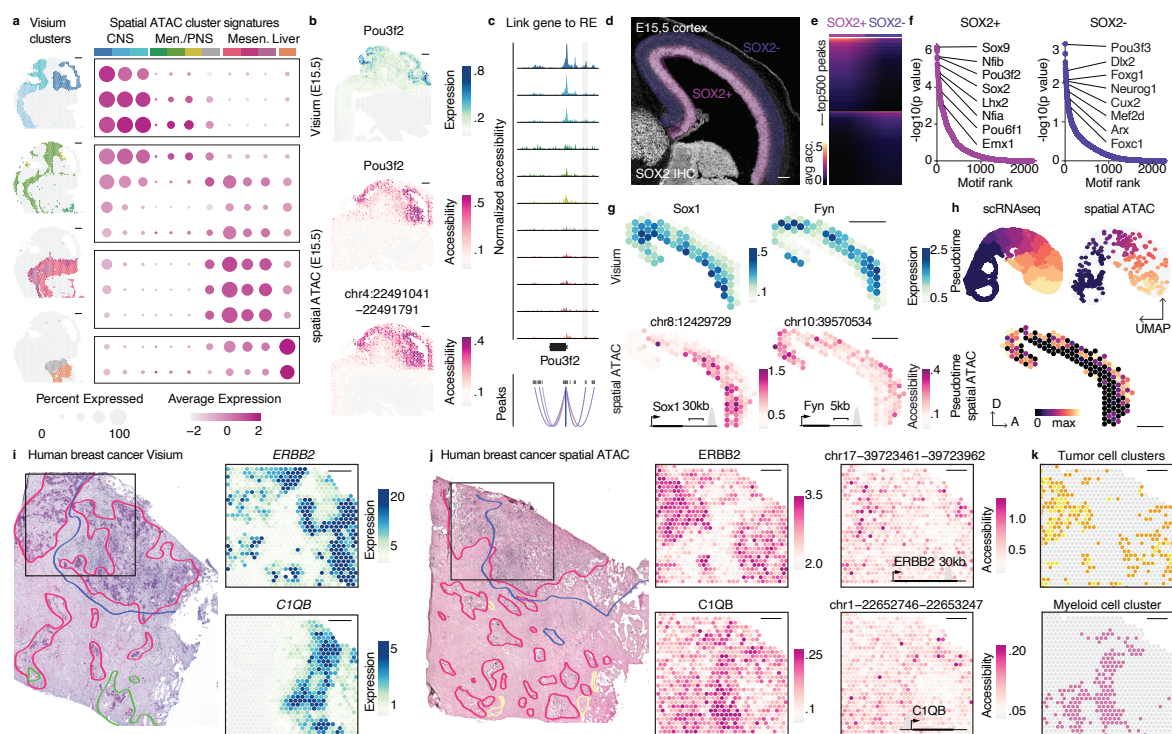



141 **Figure 2. Spatial ATAC uncovers spatiotemporal patterns of regulatory element**  
142 **accessibility underlying gene expression**

143 **a.** Visium gene expression signature scores for differentially accessible genes in spatial ATAC  
144 clusters. Visium clusters are shown on the left on an E12.5 section for reference. **b.**  
145 Concordance between Pou3f2 expression (top, cyan) and gene activity and accessibility of a  
146 co-accessible distal regulatory element (magenta). **c.** Genomic track and co-accessibility scores  
147 for peaks near the locus of the CNS marker Pou3f2. The distal element shown in b is  
148 highlighted in gray and tracks are color-coded according to spatial ATAC clusters. **d.** Cortex  
149 inset of a SOX2-immunostained E15.5 spatial ATAC sagittal section. Selected SOX2+  
150 (progenitor) and SOX2- (neuronal) regions are highlighted. **e.** Top 500 differentially accessible  
151 peaks by fold change in SOX2+ and SOX2- regions of the developing cortex. **f.** Motif  
152 enrichment analysis performed on the top 500 peaks by region. Selected top motifs for  
153 transcription factors expressed in the region are highlighted. **g.** Accessibility (spatial ATAC;  
154 magenta) and expression of the nearest gene (Visium; cyan) for loci enriched in progenitor  
155 (Sox1) or neuronal (Fyn) regions. **h.** UMAP of integrated single-cell RNA-seq and spatial  
156 ATAC from the E15.5 developing cortex colored by pseudotime and split by technology. At  
157 the bottom, pseudotime scores are projected onto their spatial locations in a spatial ATAC  
158 E15.5 section. **i.** HE image of a breast cancer section processed using Visium with overlaid  
159 pathologist annotations. On the right, expression of ERBB2 (HER2) and myeloid cell marker  
160 C1QB in the boxed inset. **j.** Annotated HE image of an adjacent (200  $\mu$ m) section processed  
161 using spatial ATAC. On the right, accessibility of the ERBB2 locus, C1QB locus and two  
162 associated regulatory regions in the boxed inset. **k.** Spatial interaction between tumor cell and  
163 myeloid cell clusters at the tumor interface. Pathology: red, invasive cancer; blue, tumor  
164 infiltrating lymphocytes; green, intravascular cancer; yellow, normal gland. Scale bars are 500  
165  $\mu$ m.

166 **References**

167

- 168 1. Nitzan, M., Karaiskos, N., Friedman, N. & Rajewsky, N. Gene expression cartography.  
169 *Nature* **576**, 132–137 (2019).
- 170 2. Klemm, S. L., Shipony, Z. & Greenleaf, W. J. Chromatin accessibility and the regulatory  
171 epigenome. *Nat Rev Genet* **20**, 207–220 (2019).
- 172 3. Shen, Y. *et al.* A map of the cis-regulatory sequences in the mouse genome. *Nature* **488**,  
173 116–120 (2012).
- 174 4. Corces, M. R. *et al.* The chromatin accessibility landscape of primary human cancers.  
175 *Science* **362**, eaav1898 (2018).
- 176 5. Ge, Y. *et al.* Stem Cell Lineage Infidelity Drives Wound Repair and Cancer. *Cell* **169**,  
177 636–650.e14 (2017).
- 178 6. Satpathy, A. T. *et al.* Massively parallel single-cell chromatin landscapes of human  
179 immune cell development and intratumoral T cell exhaustion. *Nature biotechnology* **37**,  
180 925–936 (2019).
- 181 7. Ma, S. *et al.* Chromatin Potential Identified by Shared Single-Cell Profiling of RNA and  
182 Chromatin. *Cell* **183**, 1103–1116.e20 (2020).
- 183 8. Chen, S., Lake, B. B. & Zhang, K. High-throughput sequencing of the transcriptome and  
184 chromatin accessibility in the same cell. *Nat Biotechnol* **37**, 1452–1457 (2019).
- 185 9. Palla, G., Fischer, D. S., Regev, A. & Theis, F. J. Spatial components of molecular tissue  
186 biology. *Nat Biotechnol* **40**, 308–318 (2022).
- 187 10. Deng, Y. *et al.* Spatial-CUT&Tag: Spatially resolved chromatin modification profiling at  
188 the cellular level. *Science* **375**, 681–686 (2022).
- 189 11. Thornton, C. A. *et al.* Spatially mapped single-cell chromatin accessibility. *Nat Commun*  
190 **12**, 1274 (2021).
- 191 12. Buenrostro, J. D., Giresi, P. G., Zaba, L. C., Chang, H. Y. & Greenleaf, W. J.  
192 Transposition of native chromatin for fast and sensitive epigenomic profiling of open  
193 chromatin, DNA-binding proteins and nucleosome position. *Nature methods* **10**, 1213–  
194 1218 (2013).
- 195 13. Ståhl, P. L. *et al.* Visualization and analysis of gene expression in tissue sections by  
196 spatial transcriptomics. *Science (New York, NY)* **353**, 78–82 (2016).
- 197 14. Gorkin, D. U. *et al.* An atlas of dynamic chromatin landscapes in mouse fetal  
198 development. *Nature* **583**, 744–751 (2020).
- 199 15. Stuart, T., Srivastava, A., Madad, S., Lareau, C. A. & Satija, R. Single-cell chromatin  
200 state analysis with Signac. *Nat Methods* **18**, 1333–1341 (2021).
- 201 16. Bergenstråhle, J., Larsson, L. & Lundeberg, J. Seamless integration of image and  
202 molecular analysis for spatial transcriptomics workflows. *BMC Genomics* **21**, 482 (2020).
- 203 17. Li, Z. *et al.* Chromatin-accessibility estimation from single-cell ATAC-seq data with  
204 scOpen. *Nat Commun* **12**, 6386 (2021).
- 205 18. Eraslan, G., Simon, L. M., Mircea, M., Mueller, N. S. & Theis, F. J. Single-cell RNA-seq  
206 denoising using a deep count autoencoder. *Nat Commun* **10**, 390 (2019).
- 207 19. Greig, L. C., Woodworth, M. B., Galazo, M. J., Padmanabhan, H. & Macklis, J. D.  
208 Molecular logic of neocortical projection neuron specification, development and  
209 diversity. *Nature Reviews Neuroscience* **14**, 755–769 (2013).
- 210 20. La Manno, G. *et al.* Molecular architecture of the developing mouse brain. *Nature* **596**,  
211 92–96 (2021).
- 212 21. Wu, S. Z. *et al.* A single-cell and spatially resolved atlas of human breast cancers. *Nat*  
213 *Genet* **53**, 1334–1347 (2021).

214

215



216 **Acknowledgements**

217 A. Andersson for initial help and advice with the analyses. L. Larsson, M. Lukoseviciute and  
218 C. Engblom for helpful discussions. V. Kumar for help adapting Cell Ranger. P. Backhaus for  
219 help in embryo harvesting. G. Winberg, H. Lönnqvist, M. Hagemann-Jensen and R. Sandberg  
220 for help preparing Tn5 and access to NextSeq sequencing. We thank National Genomics  
221 Infrastructure (NGI), Sweden for providing infrastructure support. The data were analyzed  
222 using resources provided by SNIC through the Uppsala Multidisciplinary Center for Advanced  
223 Computational Science (SNIC/UPPMAX).

224 This work was supported by grants from the Swedish Research Council, the Strategic Research  
225 Programme in Stem Cells and Regenerative Medicine at Karolinska Institutet (StratRegen),  
226 and the Torsten Söderbergs Stiftelse.

227

228 **Author contributions**

229 E.L.B., J.F. and P.L.S. conceived the project. E.L.B, M.M. and N.B. performed the  
230 experiments. M.Z., E.L.B. conducted the analyses and visualizations. X.C and J.H. provided  
231 cancer samples and pathology annotations. E.L.B. wrote the manuscript with input from all the  
232 authors. J.F. and P.L.S. acquired funding and supervised the project.

233

234 **Competing interests**

235 E.L.B., M.Z., M.M., N.B., J.F. and P.L.S. are scientific consultants to 10x Genomics, which  
236 holds IP rights to the spatial technology.
